# Supplementary material for: Do the fluorescent red eyes of the marine fish Tripterygion delaisi stand out? In situ and in vivo measurements at two depths
Source: PubMed Central journal article supplement (PMC5938470; doi:10.1002/ece3.4025), 2018-04-15
Supplement: ECE3-8-4685-s001.pdf [file ECE3-8-4685-s001.pdf]

Main substrates measured in -5 and -20 m

| Family        | Substrate (specific)      |                                                                                      |
|---------------|---------------------------|--------------------------------------------------------------------------------------|
| Chlorophyceae | <i>Chaetomorpha linum</i> | 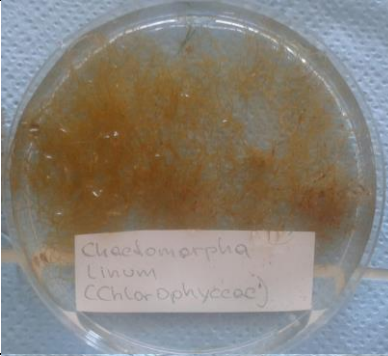   |
| Phaeophyceae  | <i>Cystoseira sp.</i>     |    |
| Phaeophyceae  | <i>Dictyota linearis</i>  |   |
| Chlorophyceae | <i>Halimeda tuna</i>      |  |

| Family        | Substrate (specific)       |                                                                                      |
|---------------|----------------------------|--------------------------------------------------------------------------------------|
| Phaeophyceae  | <i>Halopteris filicina</i> |    |
| Rhodophyceae  | <i>Jania rubens</i>        |    |
| Phaeophyceae  | <i>Padina pavonia</i>      |   |
| Chlorophyceae | <i>Udotea petiolata</i>    |  |
| Chlorophyceae | <i>Caulerpa racemosa</i>   | n.a.                                                                                 |
| Chlorophyceae | <i>Codium bursa</i>        | n.a.                                                                                 |
